# Supplementary material
Source: PubMed Central journal article supplement (PMC8099348)
Supplement: mmc1.pdf [file mmc1.pdf]

## Supplemental information

### Evidence of escape of SARS-CoV-2 variant B.1.351

#### from natural and vaccine-induced sera

Daming Zhou, Wanwisa Dejnirattisai, Piyada Supasa, Chang Liu, Alexander J. Mentzer, Helen M. Ginn, Yuguang Zhao, Helen M.E. Duyvesteyn, Aekkachai Tuekprakhon, Rungtiwa Nutalai, Beibei Wang, Guido C. Paesen, Cesar Lopez-Camacho, Jose Slon-Campos, Bassam Hallis, Naomi Coombes, Kevin Bewley, Sue Charlton, Thomas S. Walter, Donal Skelly, Sheila F. Lumley, Christina Dold, Robert Levin, Tao Dong, Andrew J. Pollard, Julian C. Knight, Derrick Crook, Teresa Lambe, Elizabeth Clutterbuck, Sagida Bibi, Amy Flaxman, Mustapha Bittaye, Sandra Belij-Rammerstorfer, Sarah Gilbert, William James, Miles W. Carroll, Paul Klenerman, Eleanor Barnes, Susanna J. Dunachie, Elizabeth E. Fry, Juthathip Mongkolsapaya, Jingshan Ren, David I. Stuart, and Gavin R. Screaton

Table S1A

| Convalescent plasma | FRNT50 (Reciprocal plasma dilution) |         | Victoria/B.1.351 ratio |
|---------------------|-------------------------------------|---------|------------------------|
|                     | Victoria                            | B.1.351 |                        |
| Convalescent 1      | 61                                  | <20     | >3.1                   |
| Convalescent 2      | 689                                 | <20     | >34.4                  |
| Convalescent 3      | 526                                 | 88      | 6.0                    |
| Convalescent 4      | 409                                 | 339     | 1.2                    |
| Convalescent 5      | 369                                 | <20     | >18.4                  |
| Convalescent 6      | 1270                                | 522     | 2.4                    |
| Convalescent 7      | 274                                 | <20     | >13.7                  |
| Convalescent 8      | 633                                 | 111     | 5.7                    |
| Convalescent 9      | 667                                 | <20     | 33.3                   |
| Convalescent 10     | 124                                 | <20     | >6.2                   |
| Convalescent 11     | 102                                 | <20     | >5.1                   |
| Convalescent 12     | 339                                 | <20     | >16.9                  |
| Convalescent 13     | 331                                 | <20     | >16.6                  |
| Convalescent 14     | 438                                 | <20     | >21.9                  |
| Convalescent 15     | 6397                                | 1147    | 5.6                    |
| Convalescent 16     | 44                                  | <20     | >2.2                   |
| Convalescent 17     | 1115                                | <20     | >55.8                  |
| Convalescent 18     | 242                                 | <20     | >12.1                  |
| Convalescent 19     | 29                                  | <20     | >1.5                   |
| Convalescent 20     | 154                                 | 21      | 7.4                    |
| Convalescent 21     | 487                                 | 58      | 8.5                    |
| Convalescent 22     | 438                                 | 53      | 8.2                    |
| Convalescent 23     | 381                                 | <20     | >19.1                  |
| Convalescent 24     | 1647                                | 72      | 22.9                   |
| Convalescent 25     | 913                                 | 202     | 4.5                    |
| Convalescent 26     | 1880                                | 348     | 5.4                    |
| Convalescent 27     | 1464                                | 67      | 21.9                   |
| Convalescent 28     | 361                                 | <20     | >18.0                  |
| Convalescent 29     | 2859                                | 748     | 3.8                    |
| Convalescent 30     | 1109                                | 184     | 6.0                    |
| Convalescent 31     | 811                                 | 210     | 3.9                    |
| Convalescent 32     | 395                                 | <20     | >19.8                  |
| Convalescent 33     | 1144                                | 48      | 23.7                   |
| Convalescent 34     | 676                                 | <20     | >33.8                  |

Table S1B.

| Kent plasma | Day after admission | FRNT50 (Reciprocal plasma dilution) |         | Victoria/B.1.351 ratio |
|-------------|---------------------|-------------------------------------|---------|------------------------|
|             |                     | Victoria                            | B.1.351 |                        |
| B.1.1.7 P1  | 5                   | <20                                 | <20     | N/A                    |
| B.1.1.7 P2  | 3                   | <20                                 | <20     | N/A                    |
| B.1.1.7 P3  | 1                   | 440                                 | <20     | >22                    |
| B.1.1.7 P4  | 1                   | 136884                              | 81493   | 1.7                    |
| B.1.1.7 P5  | 29                  | 1506                                | 278     | 5.4                    |
| B.1.1.7 P6  | 24                  | 370                                 | 80      | 4.6                    |
| B.1.1.7 P7  | 25                  | 2250                                | 159     | 14.2                   |
| B.1.1.7 P8  | 18                  | 2999                                | 867     | 3.5                    |
| B.1.1.7 P9  | 20                  | 970                                 | 336     | 2.9                    |
| B.1.1.7 P10 | 14                  | 3735                                | 1150    | 3.2                    |
| B.1.1.7 P11 | 18                  | 2193                                | 705     | 3.1                    |
| B.1.1.7 P12 | 29                  | <20                                 | <20     | N/A                    |
| B.1.1.7 P13 | 34                  | <20                                 | <20     | N/A                    |

**Table S1. FRNT50 titres against Victoria and B.1.351 strains (A) 34 convalescent plasma (B) Plasma from 13 patients infected with B.1.1.7.** The data underpinning the Victoria neutralization curves have been previously reported (Supasa et al, 2021)., related to STAR Methods Focus Reduction Neutralisation Assay (FRNT) and Figure 2.

Table S2

| Vaccine samples | Day Post-boost | FRNT50 (Reciprocal plasma dilution) |         | Victoria/B.1.351 ratio |
|-----------------|----------------|-------------------------------------|---------|------------------------|
|                 |                | Victoria                            | B.1.351 |                        |
| Pfizer1         | 7              | 1149                                | 73      | 15.7                   |
| Pfizer2         | 7              | <20                                 | <20     | N/A                    |
| Pfizer3         | 7              | 1727                                | 230     | 7.5                    |
| Pfizer4         | 8              | 2234                                | 420     | 5.3                    |
| Pfizer5         | 7              | 3016                                | 577     | 5.2                    |
| Pfizer6         | 7              | 1521                                | 152     | 10.0                   |
| Pfizer7         | 7              | 609                                 | 109     | 5.6                    |
| Pfizer8         | 7              | 4340                                | 1255    | 3.5                    |
| Pfizer9         | 7              | 1467                                | 102     | 14.4                   |
| Pfizer10        | 7              | 1757                                | 124     | 14.2                   |
| Pfizer11        | 7              | 860                                 | 121     | 7.1                    |
| Pfizer12        | 7              | 1749                                | 66      | 26.6                   |
| Pfizer13        | 7              | 1851                                | 385     | 4.8                    |
| Pfizer14        | 7              | 407                                 | 122     | 3.3                    |
| Pfizer15        | 8              | 1285                                | 202     | 6.4                    |
| Pfizer16        | 8              | 1286                                | 91      | 14.1                   |
| Pfizer17        | 8              | 1810                                | 143     | 12.7                   |
| Pfizer18        | 8              | 1198                                | 93      | 12.9                   |
| Pfizer19        | 8              | 466                                 | 61      | 7.6                    |
| Pfizer20        | 8              | 1539                                | 178     | 8.7                    |
| Pfizer21        | 9              | 184                                 | <20     | >9.2                   |
| Pfizer22        | 11             | 1061                                | 212     | 5.0                    |
| Pfizer23        | 12             | 1658                                | 100     | 16.6                   |
| Pfizer24        | 12             | 1155                                | 192     | 6.0                    |
| Pfizer25        | 15             | 8092                                | 3006    | 2.7                    |
| AstraZeneca 1   | 28             | 495                                 | 155     | 3.2                    |
| AstraZeneca 2   | 28             | 580                                 | 217     | 2.7                    |
| AstraZeneca 3   | 28             | 253                                 | <20     | >12.6                  |
| AstraZeneca 4   | 28             | 183                                 | 62      | 3.0                    |
| AstraZeneca 5   | 28             | 432                                 | 62      | 7.0                    |
| AstraZeneca 6   | 28             | 764                                 | 54      | 14.3                   |
| AstraZeneca 7   | 28             | 133                                 | <20     | >6.7                   |
| AstraZeneca 8   | 28             | 257                                 | 41      | 6.3                    |
| AstraZeneca 9   | 28             | 501                                 | 128     | 3.9                    |
| AstraZeneca 10  | 28             | 357                                 | 116     | 3.1                    |
| AstraZeneca 11  | 14             | 334                                 | 45      | 7.5                    |
| AstraZeneca 12  | 14             | 250                                 | 51      | 4.9                    |
| AstraZeneca 13  | 14             | 122                                 | <20     | >6.1                   |
| AstraZeneca 14  | 14             | 212                                 | <20     | >10.6                  |
| AstraZeneca 15  | 14             | 789                                 | 94      | 8.4                    |
| AstraZeneca 16  | 14             | 538                                 | 57      | 9.5                    |
| AstraZeneca 17  | 14             | 1159                                | 36      | 32.5                   |
| AstraZeneca 18  | 14             | 353                                 | 44      | 8.1                    |
| AstraZeneca 19  | 14             | 975                                 | 69      | 14.0                   |
| AstraZeneca 20  | 14             | 169                                 | <20     | >8.4                   |
| AstraZeneca 21  | 14             | 155                                 | <20     | >7.7                   |
| AstraZeneca 22  | 14             | 152                                 | <20     | >7.6                   |
| AstraZeneca 23  | 14             | 126                                 | <20     | >6.3                   |
| AstraZeneca 24  | 14             | 293                                 | 30      | 9.7                    |
| AstraZeneca 25  | 14             | 94                                  | <20     | >4.7                   |

**Table S2. FRNT50 titres against Victoria and B.1.351 strains (A) Serum from 25 recipients of Pfizer-BioNTech vaccine. (B) Oxford-AstraZeneca vaccine.** The data underpinning the Victoria neutralization curves have been previously reported (Supasa et al, 2021). Related to Figure 3 and STAR Methods Focus Reduction Neutralisation Assay (FRNT).

Table S3A

| mAb     | IC50 (ug/ml)  |               | B.1.351/Victoria<br>ratio | KD (nM)     |             | Immunoglobulin gene usage |      |               |
|---------|---------------|---------------|---------------------------|-------------|-------------|---------------------------|------|---------------|
|         | Victoria      | B.1.351       |                           | Native RBD  | RBD B.1.351 | IGHV                      | K/λ  | IGLV          |
| 40      | 0.026 ± 0.007 | 0.738 ± 0.311 | 28.6                      | 0.55±0.003  | 33.2±0.88   | 3-66                      | K    | 1-33 or 1D-33 |
| 55      | 0.095 ± 0.015 | 0.127 ± 0.014 | 1.3                       | 3.61±0.15   | 17.6±0.57   | 1-58                      | K    | 3-20          |
| 58      | 0.041 ± 0.003 | 0.136 ± 0.010 | 3.3                       | 0.30±0.003  | 5.96±0.12   | 3-9                       | λ    | 3-21          |
| 88      | 0.033 ± 0.001 | >10           | >615.3                    | 0.64±0.004  | 277.3±7.17  | 4-61                      | λ    | 1-36          |
| 132     | 0.048 ± 0.000 | >10           | >416.8                    | 16.0±0.09   | No signal   | 4-34                      | λ    | 7-46          |
| 150     | 0.012 ± 0.000 | 0.350 ± 0.010 | 30.0                      | 0.19±0.002  | 227.7±8.58  | 3-53                      | K    | 1-9           |
| 158     | 0.031 ± 0.004 | >10           | >654.9                    | 0.53±0.0003 | 976.5±30.7  | 3-53                      | K    | 1-9           |
| 159     | 0.011 ± 0.000 | >10           | >1856.8                   | N/A         | N/A         | 3-30                      | K    | 3-20          |
| 165     | 0.034 ± 0.004 | 0.054 ± 0.013 | 1.6                       | 3.49±0.15   | 8.57±0.20   | 1-58                      | K    | 3-20          |
| 170     | 0.025 ± 0.004 | >10           | >804.4                    | 5.75±0.07   | 1207±74.94  | 5-51                      | K    | 2D-29         |
| 175     | 0.026 ± 0.000 | >10           | >783                      | 0.97±0.005  | 1350±45.9   | 3-53                      | K    | 1-33 or 1D-33 |
| 222     | 0.019 ± 0.000 | 0.017 ± 0.005 | 0.9                       | 0.29±0.003  | 0.47±0.09   | 3-53                      | K    | 3-20          |
| 253     | 0.055 ± 0.008 | 0.109 ± 0.055 | 2.0                       | 13.9±0.48   | 12.1±0.25   | 1-58                      | K    | 3-20          |
| 269     | 0.030 ± 0.000 | >10           | >675                      | 1.59±0.009  | >1000       | 3-53                      | K    | 1-9           |
| 278     | 0.014 ± 0.007 | 0.160 ± 0.018 | 11.7                      | 5.11±0.03   | 8.84±0.16   | 1-18                      | K    | 1-39 or 1D-39 |
| 281     | 0.005 ± 0.001 | >10           | >4052.7                   | 3.20±0.01   | 79540±170   | 3-7                       | K    | 2-24          |
| 316     | 0.018 ± 0.007 | >10           | >1127.2                   | 1.50±0.01   | No signal   | 1-2                       | λ    | 2-8           |
| 318     | 0.029 ± 0.008 | 0.019 ± 0.008 | 0.7                       | 2.23±0.02   | 3.26±0.04   | 1-58                      | K    | 3-20          |
| 384     | 0.004 ± 0.001 | >10           | >4796.9                   | 0.51±0.004  | No signal   | 3-11                      | K    | 1-27          |
| 398     | 0.091 ± 0.004 | >10           | >220.5                    | 1.02±0.007  | 21.4±0.20   | 3-66                      | λ    | 2-8           |
| 253-55  | 0.003 ± 0.000 | 0.009 ± 0.002 | 2.7                       | 0.88±0.02   | 3.43±0.06   | 1-58                      | 3-20 | 3-20          |
| 253-165 | 0.003 ± 0.000 | 0.013 ± 0.003 | 3.6                       | 0.73±0.01   | 3.10±0.05   | 1-58                      | 3-20 | 3-20          |

Table S3B

| mAb         | IC50 (ug/ml)  |               | B.1.351/Victoria<br>ratio | KD (nM)    |             |
|-------------|---------------|---------------|---------------------------|------------|-------------|
|             | Victoria      | B.1.351       |                           | Native RBD | RBD B.1.351 |
| REGN R10987 | 0.032 ± 0.007 | 0.007 ± 0.001 | 0.2                       | 3.85±0.08  | 0.72±0.02   |
| REGN R10933 | 0.004 ± 0.002 | 3.284 ± 2.014 | 773.7                     | 1.82±0.03  | No signal   |
| AZD1061     | 0.013 ± 0.003 | 0.014 ± 0.002 | 1.1                       | 1.04±0.01  | 1.52±0.02   |
| AZD8895     | 0.005 ± 0.001 | 0.046 ± 0.031 | 8.9                       | 1.49±0.02  | 3.63±0.06   |

**Supplementary Table 3. FRNT50 titres against Victoria and B.1.351 strains (A) 22 human monoclonal antibodies. (B) Two Regeneron and 2 AstraZenca monoclonal antibodies.** The Mann–Whitney U test was used for the analysis and two-tailed P values were calculated, data are shown as mean ± s.e.m. The data underpinning the Victoria neutralization curves have been previously reported (Supasa et al, 2021). Related to Figure 4 and STAR Methods Focus Reduction Neutralisation Assay (FRNT).
